# Supplementary material
Source: Research Square preprint supplement (doi:10.21203/rs.3.rs-9450833/v1)
Supplement: Supplementary file 1 [file 20c49ad33140bad294770cb3.pdf]

## Supplementary Material

Determining sea turtle responses to vessel traffic using passive in situ monitoring

Marine Biology

Mitchell Rider\*, Chris Sasso, Neil Hammerschlag

\*Cooperative Institute for Marine and Atmospheric Studies

4600 Rickerbacker Cswy, Miami, Florida, 33149

mitchell.rider@earth.miami.edu

**Supplementary Table 2:** Top 10 models ranked based on the Akaike information criterion (AIC), for explaining the turtle hourly residency. An asterisk represents an interaction term.

| Predictors                                                                                  | AIC      | $\Delta$ AIC | Weight |
|---------------------------------------------------------------------------------------------|----------|--------------|--------|
| Array location                                                                              | -529.181 | 0.000        | 0.216  |
| Day type, Array location                                                                    | -528.330 | 0.851        | 0.141  |
| Diel period, Array location                                                                 | -527.640 | 1.541        | 0.100  |
| Day type, Diel period, Array location, Day type * Diel period                               | -527.379 | 1.802        | 0.088  |
| Day Type, Diel period, Array location                                                       | -527.010 | 2.171        | 0.073  |
| Day Type, Array location, Day Type * Array location                                         | -526.578 | 2.603        | 0.059  |
| Diel period, Array location, Diel Period * Array location                                   | -526.540 | 2.641        | 0.058  |
| Day Type, Diel period, Array location, Day type * Diel period, Diel Period * Array location | -526.355 | 2.827        | 0.052  |
| Day Type, Diel period, Array location, Day type * Diel period, Day Type * Array location    | -526.238 | 2.943        | 0.050  |
| Day Type, Diel period, Array location, Diel period * Array location                         | -525.854 | 3.327        | 0.041  |
