# Supplementary material
Source: Research Square preprint supplement (doi:10.21203/rs.3.rs-9450833/v1)

## Supplementary Material

Determining sea turtle responses to vessel traffic using passive in situ monitoring

Marine Biology

Mitchell Rider\*, Chris Sasso, Neil Hammerschlag

\*Cooperative Institute for Marine and Atmospheric Studies

4600 Rickerbacker Cswy, Miami, Florida, 33149

mitchell.rider@earth.miami.edu

**Supplementary Figure 1:** Abacus plot showing detection data of both boat passages and turtles detected at either mini array. The top two rows indicate boat passages at each mini array while the remaining rows represent the individual detections from all tagged loggerhead (ID's with CC) and green (ID's with CM) turtles. Colors correspond to the mini arrays located at either Boca Chita or Arsenickers Key.

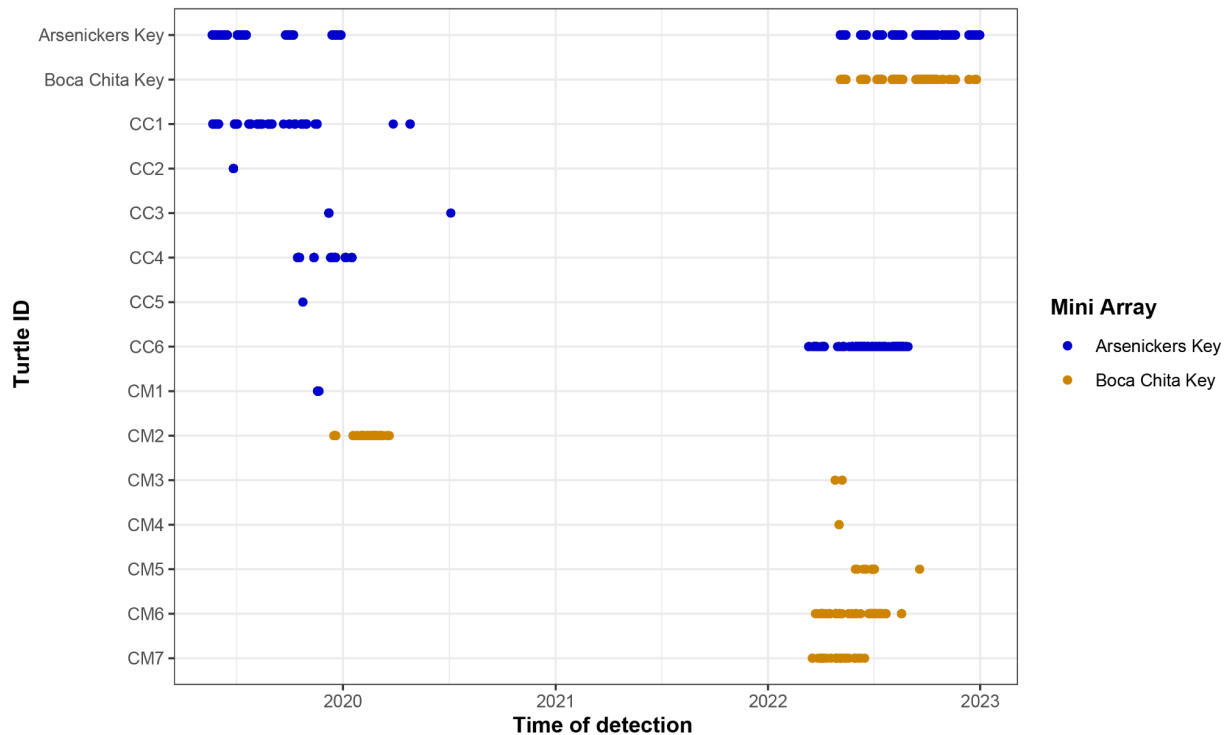

Supplement: Supplementary file 2 [file 555f9151df967c9a7ceff20c.pdf]
