# Supplementary material
Source: Research Square preprint supplement (doi:10.21203/rs.3.rs-9450833/v1)
Supplement: Supplementary file 3 [file 80891232baa4578f5d436317.pdf]

## Supplementary Material

Determining sea turtle responses to vessel traffic using passive in situ monitoring

Marine Biology

Mitchell Rider\*, Chris Sasso, Neil Hammerschlag

\*Cooperative Institute for Marine and Atmospheric Studies

4600 Rickerbacker Cswy, Miami, Florida, 33149

mitchell.rider@earth.miami.edu

**Supplementary Table 1:** Top 10 models ranked based on the Akaike information criterion (AIC), for explaining the turtle hourly residency. An asterisk represents an interaction term.

| Predictors                                                                                              | AIC     | $\Delta$ AIC | Weight |
|---------------------------------------------------------------------------------------------------------|---------|--------------|--------|
| Array location, Boat passages, Array * Boat passages                                                    | 817.096 | 0.000        | 0.279  |
| Array location, Boat passages                                                                           | 817.153 | 0.058        | 0.271  |
| Diel period, Array location, Boat passages, Array location * Boat Passages                              | 818.439 | 1.343        | 0.143  |
| Diel period, Array location, Boat passages                                                              | 818.454 | 1.358        | 0.142  |
| Diel period, Array location, Boat passages, Diel period * Boat passages, Array location * Boat passages | 819.923 | 2.827        | 0.068  |
| Diel period, Array location, Boat passages, Diel period * Boat passages                                 | 819.981 | 2.885        | 0.066  |
| Array location                                                                                          | 822.184 | 5.088        | 0.022  |
| Diel period, Array location                                                                             | 823.958 | 6.862        | 0.009  |
| Diel period, Boat passages                                                                              | 835.006 | 17.911       | 0.000  |
| Diel period, Boat passages, Diel period * Boat passages                                                 | 836.393 | 19.298       | 0.000  |
